# Supplementary material
Source: MDPI journal article supplement (https://www.mdpi.com/2071-1050/3/11/2157)

*Correction*

**Correction: The Unsustainable Trend of Natural Hazard Losses in the United States, *Sustainability* 2011, 3, 2157–2181**

**Melanie Gall <sup>1,\*</sup>, Kevin A. Borden <sup>2</sup>, Christopher T. Emrich <sup>3</sup> and Susan L. Cutter <sup>3</sup>**

<sup>1</sup> Department of Geography & Anthropology, Louisiana State University, Baton Rouge, LA 70803, USA

<sup>2</sup> Digital Sandbox Inc., 8260 Greensboro Drive #450, McLean, VA 22102, USA; E-Mail: kborden@dsbox.com

<sup>3</sup> Hazards & Vulnerability Research Institute, Department of Geography, University of South Carolina, Columbia, SC 29201, USA; E-Mails: emrich@mailbox.sc.edu (C.T.E.); scutter@mailbox.sc.edu (S.L.C.)

\* Author to whom correspondence should be addressed; E-Mail: gallm@lsu.edu; Tel.: +1-225-578-6119; Fax: +1-225-578-4420.

*Received: 13 July 2012 / Accepted: 13 July 2012 / Published: 18 July 2012*

---

The authors wish to make the following correction to this paper. Due to mislabeling, replace:

**Figure 4b.** Temporal changes in annual total losses (b) by decade and hazard type.

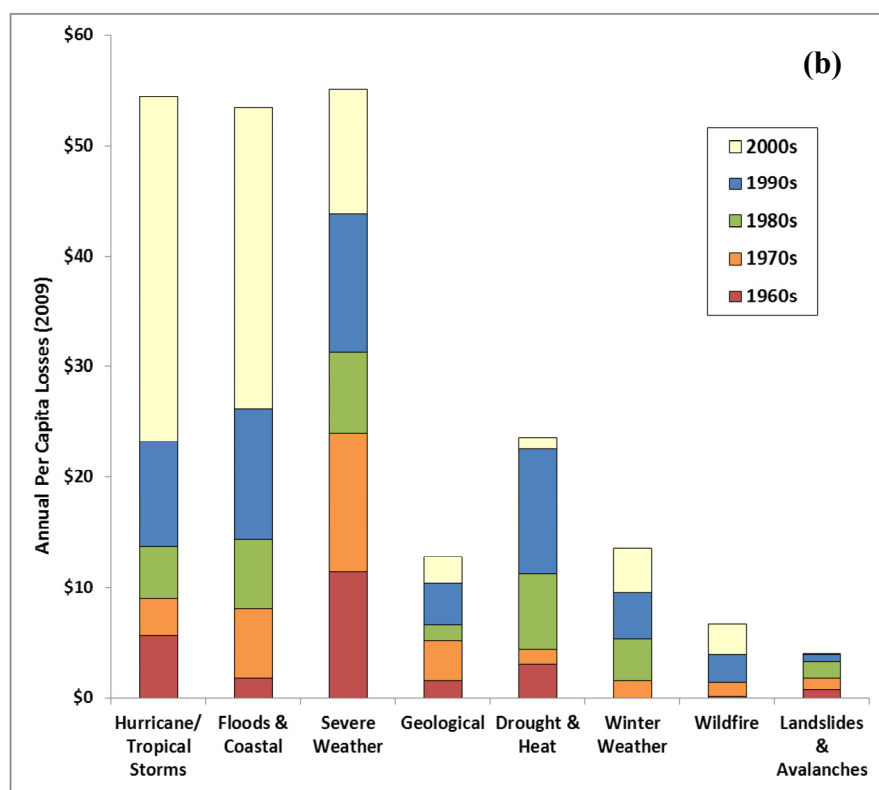

with:

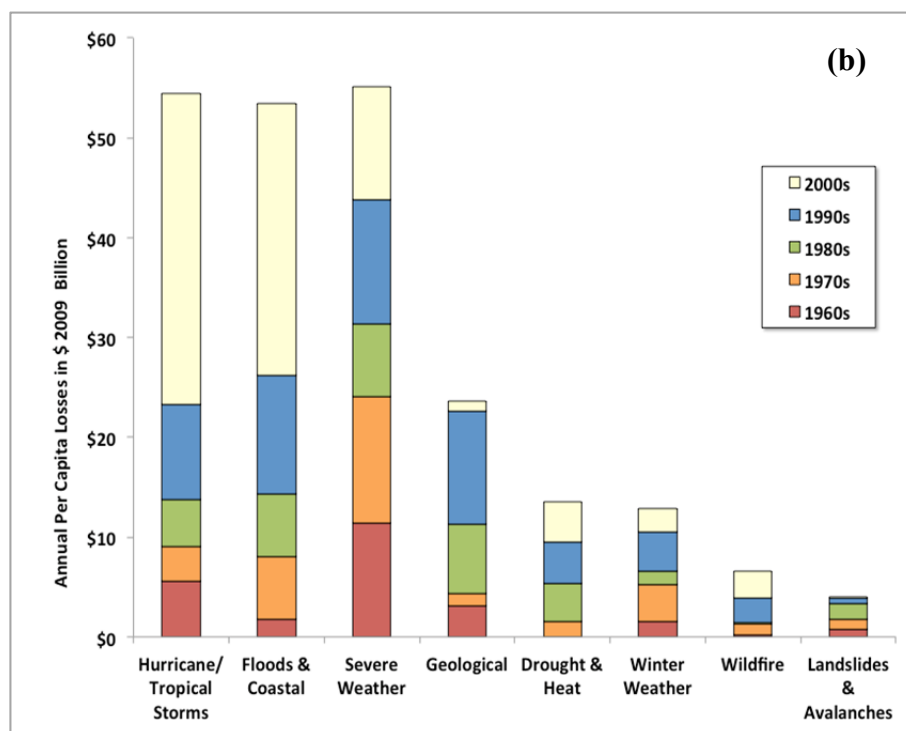

Supplement: s1 [file s1]
